# Supplementary material for: Challenges to Sustainable Safe Drinking Water: A Case Study of Water Quality and Use across Seasons in Rural Communities in Limpopo Province, South Africa
Source: PubMed Central journal article supplement (PMC6310213; doi:10.3390/w10020159), 2018-02-07
Supplement: NIHMS989490-supplement-Tables_S1_through_S5.pdf [file NIHMS989490-supplement-Tables_S1_through_S5.pdf]

S1 Table: Physical characteristics of a range of water sources in the study area. Two to three measurements were taken during an intensive operation period from 13 January 2017 to 04 February 2017 in the wet season and three to four measurements from 05 June 2016 to 15 July 2016 in the dry season. The median measurement of the values is reported here. Ephemeral rivers that do not flow all the way into the valley are indicated (\*) in the dry season.

| Sources | Wet<br>pH                 | Dry<br>pH                 | Wet<br>Turbidity<br>(NTU)        | Dry<br>Turbidity<br>(NTU)       | Wet<br>EC ( $\mu\text{s/cm}$ ) | Dry<br>EC ( $\mu\text{s/cm}$ ) |
|---------|---------------------------|---------------------------|----------------------------------|---------------------------------|--------------------------------|--------------------------------|
| MT      | 7.3                       | 8.7                       | 4                                | 1                               | 47                             | 70                             |
| MD      | 6.9                       | 8.6                       | 14                               | 2                               | 34                             | 62                             |
| MU      | 6.9                       | 5.9                       | 4                                | 4                               | 23                             | 55                             |
| TB      | 5.6                       | *                         | 3                                | *                               | 26                             | *                              |
| MA      | 5.5                       | *                         | 1                                | *                               | 27                             | *                              |
| PF      | 6.0                       | *                         | 1                                | *                               | 24                             | *                              |
| TH      | 6.4                       | *                         | 8                                | *                               | 30                             | *                              |
| IR      | 7.2                       | 6.7                       | 1                                | 0                               | 29                             | 40                             |
| CA      | 6.4                       | 5.8                       | 4                                | 11                              | 24                             | 8                              |
| CB      | 6.4                       | 7.2                       | 14                               | 0                               | 24                             | 68                             |
| CC      | 6.8                       | 6.4                       | 15                               | 1                               | 74                             | 77                             |
| TS      | 6.1                       | 6.5                       | 6                                | 1                               | 104                            | 120                            |
| OS      | 5.6                       | 6                         | 1                                | 3                               | 69                             | 73                             |
| LS      | 6.3                       | 7.1                       | 5                                | 3                               | 82                             | 103                            |
| CR      | 6.7                       | 6.9                       | 15                               | 21                              | 204                            | 285                            |
| CT      | 7.1                       | 7.3                       | 1                                | 1                               | 405                            | 402                            |
| MB      | 7.5                       | *                         | 111                              | *                               | 163                            | *                              |
| PS      | *                         | 5.4                       | *                                | 1                               | *                              | 54                             |
| WHO     | nl                        | nl                        | nl                               | nl                              | nl                             | nl                             |
| SANS    | 5 to 9.7<br>(operational) | 5 to 9.7<br>(operational) | 1 (operational)<br>5 (aesthetic) | 1(operational)<br>5 (aesthetic) | 17000<br>(aesthetic)           | 17000<br>(aesthetic)           |

S2 Table: Membrane filtration results for *E. coli* and total coliforms. South African regulation (SANS 241:1-2015) set the limit of 0 CFU/100 mL for *E. coli* and 10 CFU/100 mL for total coliforms. Ephemeral rivers that do not flow all the way into the valley are indicated (\*) in the dry season.

| Sources | Wet<br>E. coli<br>(cfu/100 mL) | Dry<br>E. coli<br>(cfu/100 mL) | Wet<br>Total Coliform<br>(cfu/100 mL) | Dry<br>Total coliform<br>(cfu/100 mL) |
|---------|--------------------------------|--------------------------------|---------------------------------------|---------------------------------------|
| MT      | 0                              | 0                              | 10                                    | 0                                     |
| MD      | 100                            | 74                             | 11800                                 | 7600                                  |
| MU      | 300                            | 3                              | 10700                                 | 5000                                  |
| TB      | 140                            | *                              | 30000                                 | *                                     |
| MA      | 98                             | *                              | 30000                                 | *                                     |
| PF      | 1900                           | *                              | 31900                                 | *                                     |
| TH      | 1200                           | *                              | 31000                                 | *                                     |
| IR      | 2200                           | 11                             | 32200                                 | 178                                   |
| CA      | 300                            | 1                              | 11900                                 | 89                                    |
| CB      | 66                             | 0                              | 10100                                 | 45                                    |
| CC      | 200                            | 18                             | 13200                                 | 2000                                  |
| TS      | 12                             | 0                              | 2600                                  | 49                                    |
| OS      | 6                              | 0                              | 400                                   | 130                                   |
| LS      | 800                            | 0                              | 23600                                 | 271                                   |
| CR      | 7                              | 0                              | 11600                                 | 2                                     |
| CT      | 0                              | 0                              | 152                                   | 52                                    |
| MB      | 200                            | *                              | 30000                                 | *                                     |
| PS      | *                              | 0                              | *                                     | 42                                    |
| WHO     | 0                              | 0                              | indicator only                        | indicator only                        |
| SANS    | 0<br>(acute health)            | 0<br>(acute health)            | 10<br>(operational)                   | 10 (operational)                      |

S3 Table: Anions concentration (mg/L) in various water sources within the study area, bdl and NA, NQ represent below detection limit, no available data and not quantified. Ephemeral rivers that do not flow all the way into the valley are indicated (\*) in the dry season. Sources: WHO and SANS represent, World Health Organization and South African National Standards.

| Sources | Anions (mg/L)         |                       |                        |                        |                                      |                                      |                                     |                                     |                                      |                                      |                        |                        |
|---------|-----------------------|-----------------------|------------------------|------------------------|--------------------------------------|--------------------------------------|-------------------------------------|-------------------------------------|--------------------------------------|--------------------------------------|------------------------|------------------------|
|         | F <sup>-</sup><br>wet | F <sup>-</sup><br>dry | Br <sup>-</sup><br>wet | Br <sup>-</sup><br>dry | SO <sub>4</sub> <sup>2-</sup><br>wet | SO <sub>4</sub> <sup>2-</sup><br>dry | NO <sub>3</sub> <sup>-</sup><br>wet | NO <sub>3</sub> <sup>-</sup><br>dry | PO <sub>4</sub> <sup>3-</sup><br>wet | PO <sub>4</sub> <sup>3-</sup><br>dry | Cl <sup>-</sup><br>wet | Cl <sup>-</sup><br>dry |
| MT      | 1.33                  | bdl                   | 5.32                   | 11.09                  | 2.8                                  | bdl                                  | bdl                                 | bdl                                 | bdl                                  | 3.95                                 | 21.3                   | 58.57                  |
| MD      | 1.29                  | bdl                   | bdl                    | 5.41                   | 3.35                                 | bdl                                  | bdl                                 | bdl                                 | bdl                                  | bdl                                  | 10.93                  | 36.99                  |
| MU      | #                     | bdl                   | #                      | 4.84                   | #                                    | bdl                                  | #                                   | bdl                                 | #                                    | bdl                                  | #                      | 31.54                  |
| TB      | 1.33                  | *                     | #                      | *                      | 2.95                                 | *                                    | bdl                                 | *                                   | 3.92                                 | *                                    | bdl                    | *                      |
| MA      | 1.31                  | *                     | #                      | *                      | 3.63                                 | *                                    | bdl                                 | *                                   | bdl                                  | *                                    | 19.24                  | *                      |
| PF      | 1.29                  | *                     | 3.23                   | *                      | 3.79                                 | *                                    | bdl                                 | *                                   | bdl                                  | *                                    | 23.04                  | *                      |
| TH      | 1.3                   | bdl                   | 4.46                   | 4.86                   | 3.65                                 | 0.63                                 | bdl                                 | bdl                                 | bdl                                  | bdl                                  | 20.65                  | 33.67                  |
| IR      | 1.29                  | bdl                   | 3.85                   | 6.54                   | 3.86                                 | 0.82                                 | bdl                                 | bdl                                 | bdl                                  | 0.56                                 | 19.95                  | 34.43                  |
| CA      | 1.29                  | bdl                   | 2.09                   | 11.83                  | 3.05                                 | bdl                                  | bdl                                 | bdl                                 | bdl                                  | 1.78                                 | 10.09                  | 54.99                  |
| CB      | #                     | bdl                   | #                      | 5.11                   | #                                    | bdl                                  | #                                   | bdl                                 | #                                    | bdl                                  | #                      | 53.72                  |
| CC      | 1.29                  | bdl                   | 1.99                   | 7.61                   | 3.33                                 | bdl                                  | bdl                                 | bdl                                 | bdl                                  | bdl                                  | 9.99                   | 40.93                  |
| TS      | 1.3                   | #                     | 4.08                   | #                      | 2.51                                 | #                                    | 9.72                                | #                                   | bdl                                  | #                                    | 28.25                  | #                      |
| OS      | 1.29                  | 0.47                  | 2.25                   | 10.06                  | 3.3                                  | 1.3                                  | 5.56                                | bdl                                 | bdl                                  | 3.25                                 | 12.78                  | 94.35                  |
| LS      | 1.29                  | 0.82                  | 3.33                   | 24.19                  | 3.88                                 | 1.65                                 | 5.21                                | bdl                                 | bdl                                  | 7.86                                 | 11.27                  | 85.15                  |
| CR      | #                     | 0.33                  | #                      | 4.96                   | #                                    | 0.9                                  | #                                   | 2.47                                | #                                    | 0                                    | #                      | 52.56                  |
| CT      | 1.48                  | *                     | 1.35                   | *                      | 2.69                                 | *                                    | 5.35                                | *                                   | 3.99                                 | *                                    | 10                     | *                      |
| MB      | #                     | *                     | #                      | *                      | #                                    | *                                    | #                                   | *                                   | #                                    | *                                    | #                      | *                      |
| PS      | *                     | bdl                   | *                      | 1.93                   | *                                    | bdl                                  | *                                   | 0.64                                | *                                    | bdl                                  | *                      | 44.63                  |
| WHO     | 1.5                   | 1.5                   | nl                     | nl                     | nl                                   | nl                                   | 50                                  | 50                                  | nl                                   | nl                                   | nl                     | nl                     |
| SANS    | 1.5                   | bdl                   | nl                     | 11.09                  | 250                                  | 250                                  | 50                                  | 50                                  | nl                                   | nl                                   | 300                    | 300                    |



S5 Table: Trace metal concentrations ( $\mu\text{g/L}$ ) in various water sources around the area of study, where bdl and NA represent below detection limit and No available guideline value. WHO and SANS represent, World Health Organization and South African National Standards.

| Metals<br>( $\mu\text{g/L}$ ) | CR<br>dry | CR<br>wet | CT<br>dry | CT<br>wet | MU<br>dry | MU<br>wet | MD<br>dry | MD<br>wet | IR<br>dry | IR<br>wet | PS<br>dry | PS<br>wet | WHO<br>[21] | SANS<br>[18] |
|-------------------------------|-----------|-----------|-----------|-----------|-----------|-----------|-----------|-----------|-----------|-----------|-----------|-----------|-------------|--------------|
| Li                            | 0.73      | 1.53      | 2.70      | 1.21      | 0.19      | bdl       | bdl       | 0.14      | 0.20      | bdl       | bdl       | bdl       | NA          | NA           |
| Be                            | 0.01      | bdl       | bdl       | 0.05      | bdl       | bdl       | 0.02      | bdl       | bdl       | 0.00      | 0.02      | 0.02      | NA          | NA           |
| B                             | 19.14     | 13.48     | 13.79     | 14.44     | 8.05      | 6.58      | 8.18      | 8.56      | 5.71      | 9.16      | 5.68      | 9.38      | NA          | 2400         |
| Al                            | 5.12      | 39.18     | 5.56      | 25.10     | 27.93     | 145.67    | 80.42     | 83.62     | 23.51     | 97.83     | 34.84     | 80.02     | NA          | 300          |
| V                             | 4.78      | 6.72      | 8.87      | 0.81      | 0.71      | 0.78      | 0.98      | 0.76      | 0.33      | 0.47      | 0.37      | 0.30      | NA          | 100          |
| Cr                            | 3.63      | 3.91      | 3.84      | 3.63      | 3.93      | 4.27      | 4.22      | 4.10      | 3.83      | 6.70      | 3.80      | 5.63      | 50          | 50           |
| Mn                            | 5.69      | 8.37      | 1.48      | 2.55      | 56.20     | 41.67     | 76.05     | 52.89     | 3.04      | 4.44      | 27.28     | 12.80     | NA          | 100/400      |
| Fe                            | 741.75    | 1268.27   | 87.91     | 65.00     | 1262.11   | 436.00    | 975.25    | 696.56    | 142.50    | 113.94    | 446.84    | 85.71     | NA          | 300/2000     |
| Co                            | 0.05      | 0.15      | 0.04      | 0.09      | 0.60      | 0.68      | 0.81      | 0.52      | 0.13      | 0.31      | 2.26      | 0.34      | NA          | NA           |
| Ni                            | 3.29      | 3.95      | 2.03      | 2.89      | 2.21      | 3.85      | 3.08      | 5.84      | 2.57      | 5.53      | 4.92      | 4.20      | 70          | 70           |
| Cu                            | 55.35     | 12.15     | 0.25      | 13.02     | 0.14      | 7.94      | 3.95      | 15.60     | 2.06      | 9.84      | 4.21      | 5.35      | 2000        | 2000         |
| Zn                            | 177.15    | 61.32     | 13.81     | 67.90     | 0.96      | 69.07     | 35.54     | 13.47     | 3.47      | 67.10     | 4.20      | 35.74     | NA          | 5000         |
| As                            | 0.10      | 1.20      | 0.15      | 1.33      | 0.06      | 1.33      | 0.57      | 0.08      | 0.04      | 0.39      | 0.05      | 0.13      | 10          | 10           |
| Se                            | 0.11      | 0.08      | 0.11      | 0.06      | 0.03      | 0.05      | 0.06      | 0.02      | 0.02      | 0.03      | 0.02      | 0.04      | 40          | 40           |
| Sr                            | 30.80     | 35.00     | 57.49     | 93.79     | 12.19     | 6.10      | 10.99     | 15.46     | 5.98      | 6.70      | 12.85     | 7.26      | NA          | NA           |
| Mo                            | 0.14      | 0.14      | 0.16      | 0.34      | 0.12      | 0.15      | 0.14      | 0.14      | 0.12      | 0.15      | 0.13      | 0.11      | NA          | NA           |
| Cd                            | 0.05      | 0.02      | 0.00      | 0.04      | bdl       | 0.06      | 0.02      | 0.03      | 0.00      | 0.11      | 0.01      | 0.06      | 3           | 3            |
| Sb                            | 0.01      | 0.25      | 0.02      | 0.21      | 0.00      | 1.02      | 0.78      | 0.25      | 0.03      | 0.64      | 0.07      | 0.18      | 20          | 20           |
| Hg                            | 0.01      | 0.01      | 0.01      | 0.02      | 0.01      | 0.00      | 0.00      | 0.01      | 0.01      | 0.04      | 0.01      | 0.03      | 6           | 6            |
| Pb                            | 1.31      | 1.33      | 0.23      | 1.40      | 0.20      | 1.61      | 0.76      | 0.91      | 0.41      | 1.58      | 0.39      | 0.89      | 10          | 10           |
| Ba                            | bdl       | 8.25      | bdl       | 47.23     | bdl       | 7.60      | 9.81      | 0.01      | bdl       | 7.47      | 0.02      | 9.91      | 700         | 700          |

S5 Table continued

| Metals<br>(µg/L) | CA<br>dry | CA<br>wet | CB<br>dry | CB<br>wet | CC<br>dry | CC<br>wet | TS<br>dry | TS<br>wet | MB<br>wet | MT<br>dry | MT<br>wet | WHO<br>[21] | SANS<br>[18] |
|------------------|-----------|-----------|-----------|-----------|-----------|-----------|-----------|-----------|-----------|-----------|-----------|-------------|--------------|
| Li               | 0.24      | bdl       | bdl       | bdl       | bdl       | bdl       | 0.79      | bdl       | 1.48      | 0.20      | bdl       | NA          | NA           |
| Be               | bdl       | 0.05      | 0.01      | 0.00      | bdl       | 0.00      | 0.01      | 0.05      | 0.02      | bdl       | 0.00      | NA          | NA           |
| B                | 4.59      | 8.84      | 5.01      | 4.69      | 2.99      | 6.33      | 8.00      | 6.19      | 14.50     | 9.95      | 7.02      | NA          | 2400         |
| Al               | 27.81     | 344.28    | 8.40      | 437.95    | 23.40     | 90.51     | 9.79      | 40.54     | 113.91    | 271.25    | 0.69      | NA          | 300          |
| V                | 0.23      | 0.97      | 0.96      | 8.21      | 1.40      | 0.92      | 0.74      | 1.08      | 10.57     | 2.58      | 0.57      | NA          | 100          |
| Cr               | 3.76      | 4.60      | 3.83      | 5.21      | 3.82      | 4.33      | 3.95      | 3.97      | 3.90      | 4.62      | 4.06      | 50          | 50           |
| Mn               | 2.69      | 29.63     | 3.30      | 50.55     | 2.21      | 3.63      | 1.19      | 2.80      | 33.23     | 17.92     | 45.68     | NA          | 100/400      |
| Fe               | 96.64     | 1046.87   | 48.66     | 1354.28   | 81.88     | 115.09    | 35.21     | 63.93     | 126.48    | 253.30    | 210.12    | NA          | 300/2000     |
| Co               | 0.11      | 0.88      | 0.08      | 1.71      | 0.11      | 0.18      | 0.04      | 0.11      | 0.55      | 1.07      | 0.21      | NA          | NA           |
| Ni               | 2.85      | 4.16      | 3.09      | 4.76      | 2.96      | 2.66      | 3.03      | 3.33      | 3.45      | 9.83      | 2.78      | 70          | 70           |
| Cu               | 2.01      | 8.47      | 0.12      | 4.82      | 1.81      | 2.27      | 1.55      | 2.93      | 1.99      | 75.31     | 3.70      | 2000        | 2000         |
| Zn               | 3.51      | 112.42    | 2.14      | 44.88     | 3.09      | 34.14     | 2.17      | 63.79     | 1955.39   | 88.08     | 40.73     | NA          | 5000         |
| As               | 0.03      | 0.68      | 0.03      | 0.57      | 0.13      | 0.55      | 0.05      | 2.57      | 0.49      | 0.19      | 0.69      | 10          | 10           |
| Se               | 0.01      | 0.06      | 0.02      | 0.04      | 0.04      | 0.05      | 0.03      | 0.04      | 0.04      | 0.02      | 0.05      | 40          | 40           |
| Sr               | 3.58      | 5.47      | 15.77     | 12.18     | 24.75     | 4.41      | 23.90     | 23.40     | 51.64     | 19.65     | 18.12     | NA          | NA           |
| Mo               | 0.12      | 0.14      | 0.14      | 0.13      | 0.20      | 0.13      | 0.15      | 0.13      | 0.17      | 0.16      | 0.15      | NA          | NA           |
| Cd               | 0.00      | 0.09      | 0.00      | 0.03      | 0.01      | 0.02      | 0.00      | 0.03      | 0.01      | 0.09      | 0.02      | 3           | 3            |
| Sb               | 0.05      | 0.24      | 0.00      | 0.22      | 0.04      | 0.13      | 0.02      | 0.49      | 0.21      | 0.38      | 6.36      | 20          | 20           |
| Hg               | 0.02      | 0.01      | 0.01      | 0.01      | 0.01      | 0.01      | 0.01      | bdl       | bdl       | 0.02      | bdl       | 6           | 6            |
| Pb               | 0.35      | 1.64      | 0.24      | 0.99      | 0.34      | 0.54      | 0.28      | 1.01      | 0.57      | 3.79      | 0.25      | 10          | 10           |
| Ba               | bdl       | 7.52      | 0.01      | 13.59     | bdl       | 5.03      | 0.01      | 8.63      | 10.79     | 0.01      | 0.78      | 700         | 700          |
